# Supplementary material for: Data sharing and reanalysis of randomized controlled trials in leading biomedical journals with a full data sharing policy: survey of studies published in The BMJ and PLOS Medicine
Source: PubMed Central journal article supplement — BMJ. 2018 Feb 13;360:k400. doi: 10.1136/bmj.k400 (PMC5809812; doi:10.1136/bmj.k400), 2018-02-13
Supplement: nauf041198.wt1.pdf [file nauf041198.wt1.pdf]

| Study ID         | Treatment comparison / condition                                  | Primary outcome measures                         | Effect size (type) | Effect size measure | p-value         | Effect size measure | p-value     |
|------------------|-------------------------------------------------------------------|--------------------------------------------------|--------------------|---------------------|-----------------|---------------------|-------------|
|                  |                                                                   |                                                  |                    | Published paper     | Published paper | Re-analysis         | Re-analysis |
| Gilbody, 2015    | Beating the Blues VS usual care / Depression                      | Being depressed (PHQ-9)                          | OR, 95%CI          | 1.19 [0.75, 1.88]   | 0.46            | 1.19 [0.75, 1.88]   | 0.46        |
|                  | MoodGYM VS usual care / Depression                                | Being depressed (PHQ-9)                          | OR, 95%CI          | 0.98 [0.62, 1.56]   | 0.95            | 0.98 [0.62, 1.56]   | 0.95        |
|                  | MoodGYM VS Beating the Blues / Depression                         | Being depressed (PHQ-9)                          | OR, 95%CI          | 0.91 [0.62, 1.34]   | 0.69            | 0.91 [0.62, 1.34]   | 0.69        |
| Barker, 2016     | Program to decrease fall injuries VS usual care / Acute hospitals | Falls                                            | RaR, 95%CI         | 1.04 [0.78, 1.37]   | 0.80            | 1.04 [0.78, 1.37]   | 0.80        |
|                  |                                                                   | Falls injury                                     | RaR, 95%CI         | 0.96 [0.72, 1.27]   | 0.77            | 0.96 [0.72, 1.27]   | 0.77        |
| van der Aa, 2015 | Stepped care VS usual care / Visually impaired older adults       | Incidence of depressive and/or anxiety disorders | RR, 95%CI          | 0.63 [0.45, 0.87]   | 0.01            | 0.63 [0.45, 0.87]   | 0.004       |

**e-Table 1: Results of the re-analyses for 3 ineligible studies published in the BMJ after the policy but submitted before.**

OR: Odds ratio; RR: Relative Risk; RaR: Rate Ratio; ITT: Intention To Treat; PP: Per Protocol.
